# Supplementary material
Source: publisher figshare collection journal article supplement (https://acs.figshare.com/ndownloader/files/9410581)
Supplement: Supplementary file 1 [file 9410581]

## Sheet: S1
SVWN5	Density	Gradient	Laplacian
B3+	0.014783	0.139888	0.926882
C4+	0.01241	0.143364	1.15999
N5+	0.010696	0.145933	1.39439
O6+	0.009399	0.147881	1.62971
F7+	0.008383	0.149425	1.86565
Ne8+	0.007566	0.150673	2.10193
Be	0.020595	0.08008	0.354572
B+	0.015004	0.078723	0.461484
C2+	0.012715	0.077644	0.552262
N3+	0.011878	0.077161	0.626942
O4+	0.011633	0.077811	0.687091
F5+	0.011471	0.080334	0.734178
Ne6+	0.011357	0.085093	0.770925
Ne	0.012291	0.076605	0.71765
Average	0.0121558	0.107901	0.998832
SOGGA11	Density	Gradient	Laplacian
B3+	0.012094	0.136399	1.86786
C4+	0.009764	0.134101	2.47531
N5+	0.00818	0.129218	2.8482
O6+	0.006984	0.121962	2.91069
F7+	0.006103	0.11652	2.98973
Ne8+	0.005434	0.111666	2.9533
Be	0.033944	0.102846	0.681282
B+	0.019951	0.08638	0.827277
C2+	0.017385	0.090469	1.05799
N3+	0.014682	0.092074	1.32858
O4+	0.013326	0.094449	1.55593
F5+	0.01289	0.097503	1.70653
Ne6+	0.0126	0.102454	1.81626
Ne	0.017711	0.085932	0.86611
Average	0.0136463	0.107284	1.84893
BLYP	Density	Gradient	Laplacian
B3+	0.007547	0.071761	0.711529
C4+	0.006119	0.070957	0.859173
N5+	0.005138	0.070346	1.00639
O6+	0.004425	0.069891	1.15361
F7+	0.003883	0.069541	1.30129
Ne8+	0.00346	0.069271	1.44854
Be	0.01495	0.050241	0.316505
B+	0.009227	0.04526	0.395738
C2+	0.008615	0.046715	0.470001
N3+	0.008554	0.053938	0.567007
O4+	0.00876	0.061815	0.680157
F5+	0.009064	0.071043	0.808108
Ne6+	0.009346	0.081672	0.957166
Ne	0.011817	0.051555	0.468437
Average	0.00792179	0.0631433	0.795975
PBE	Density	Gradient	Laplacian
B3+	0.007681	0.067824	0.61358
C4+	0.00639	0.069003	0.762874
N5+	0.005471	0.06983	0.913603
O6+	0.004785	0.070408	1.06492
F7+	0.004252	0.070926	1.21664
Ne8+	0.003823	0.07131	1.36912
Be	0.010134	0.039374	0.263173
B+	0.008831	0.039887	0.346471
C2+	0.009011	0.045081	0.429695
N3+	0.009159	0.053071	0.532875
O4+	0.009369	0.061989	0.650409
F5+	0.009592	0.072021	0.780884
Ne6+	0.009796	0.082759	0.928984
Ne	0.008663	0.036917	0.379667
Average	0.00763979	0.0607429	0.732349
BP86	Density	Gradient	Laplacian
B3+	0.005571	0.057281	0.600567
C4+	0.004652	0.058729	0.749028
N5+	0.004013	0.060031	0.90142
O6+	0.003545	0.061191	1.05607
F7+	0.003182	0.062197	1.21278
Ne8+	0.002891	0.063067	1.37067
Be	0.011063	0.037572	0.251325
B+	0.009601	0.040237	0.335986
C2+	0.009452	0.04928	0.433349
N3+	0.009551	0.059131	0.547772
O4+	0.009705	0.069552	0.679625
F5+	0.009866	0.080554	0.834129
Ne6+	0.010023	0.092044	1.02014
Ne	0.008096	0.038142	0.402672
Average	0.00722936	0.0592149	0.742537
RGE2	Density	Gradient	Laplacian
B3+	0.0083	0.064946	0.456247
C4+	0.006901	0.066016	0.575734
N5+	0.005905	0.066713	0.695504
O6+	0.005162	0.067214	0.814145
F7+	0.004586	0.067623	0.93254
Ne8+	0.004127	0.067963	1.05042
Be	0.014083	0.039098	0.195092
B+	0.01257	0.042081	0.257709
C2+	0.011904	0.045695	0.311707
N3+	0.011453	0.051466	0.370273
O4+	0.011196	0.058105	0.435912
F5+	0.011084	0.065957	0.516324
Ne6+	0.01104	0.074954	0.646459
Ne	0.007611	0.036276	0.343008
Average	0.00899443	0.0581505	0.542934
M06L	Density	Gradient	Laplacian
B3+	0.002738	0.041343	0.808775
C4+	0.002471	0.04271	0.906244
N5+	0.002191	0.042966	0.996442
O6+	0.001953	0.043143	1.11021
F7+	0.001721	0.04229	1.19728
Ne8+	0.001536	0.041577	1.29092
Be	0.018698	0.055868	0.454859
B+	0.013768	0.053536	0.566817
C2+	0.012644	0.05649	0.639369
N3+	0.012574	0.069634	0.75293
O4+	0.012933	0.085174	0.906346
F5+	0.013092	0.099598	1.07897
Ne6+	0.01318	0.113519	1.28863
Ne	0.005495	0.04044	0.528301
Average	0.00821386	0.0591634	0.894721
PKZB	Density	Gradient	Laplacian
B3+	0.006927	0.059978	0.521122
C4+	0.005745	0.061012	0.635668
N5+	0.004904	0.061629	0.75353
O6+	0.004275	0.061973	0.877423
F7+	0.003793	0.062278	1.00193
Ne8+	0.003406	0.062501	1.12763
Be	0.012838	0.037469	0.239147
B+	0.012878	0.044078	0.325978
C2+	0.012558	0.053143	0.425891
N3+	0.01231	0.063242	0.538441
O4+	0.012146	0.074111	0.668324
F5+	0.012032	0.085358	0.826102
Ne6+	0.011962	0.097209	1.02924
Ne	0.006071	0.019597	0.225279
Average	0.00870321	0.0602556	0.656835
SCAN	Density	Gradient	Laplacian
B3+	0.003455	0.035727	0.371965
C4+	0.002842	0.035867	0.453644
N5+	0.00241	0.035929	0.535208
O6+	0.002094	0.035961	0.616726
F7+	0.00185	0.035983	0.697982
Ne8+	0.001658	0.036	0.779275
Be	0.015685	0.033932	0.169517
B+	0.013415	0.041913	0.2435
C2+	0.012817	0.051834	0.33488
N3+	0.012597	0.062885	0.4456
O4+	0.012469	0.074357	0.580803
F5+	0.012383	0.086206	0.753089
Ne6+	0.012335	0.098492	0.966594
Ne	0.002852	0.016347	0.209433
Average	0.00777586	0.0486738	0.511301
MS0	Density	Gradient	Laplacian
B3+	0.003175	0.031723	0.321033
C4+	0.002718	0.033306	0.409319
N5+	0.002375	0.034429	0.498296
O6+	0.002108	0.035269	0.588322
F7+	0.001894	0.035928	0.678735
Ne8+	0.001719	0.036472	0.769604
Be	0.01419	0.032621	0.158388
B+	0.013105	0.042227	0.237394
C2+	0.012675	0.053485	0.338853
N3+	0.012389	0.064426	0.453601
O4+	0.0122	0.075521	0.594793
F5+	0.012094	0.087226	0.775881
Ne6+	0.012035	0.099423	0.989255
Ne	0.003495	0.019796	0.246592
Average	0.00758371	0.0487037	0.50429
TPSS	Density	Gradient	Laplacian
B3+	0.002836	0.02288	0.254286
C4+	0.002404	0.024102	0.320658
N5+	0.00208	0.024983	0.379493
O6+	0.00183	0.025567	0.432064
F7+	0.001633	0.025988	0.48379
Ne8+	0.001473	0.02631	0.534235
Be	0.011578	0.025186	0.113113
B+	0.010874	0.03654	0.17641
C2+	0.010862	0.048424	0.26217
N3+	0.010886	0.06005	0.377852
O4+	0.010913	0.071803	0.520056
F5+	0.010958	0.083885	0.690801
Ne6+	0.011014	0.096273	0.890566
Ne	0.005996	0.025994	0.216594
Average	0.00680979	0.0427132	0.403721
M062X	Density	Gradient	Laplacian
B3+	0.005906	0.073079	0.978617
C4+	0.005017	0.076058	1.27001
N5+	0.004366	0.077876	1.55198
O6+	0.003875	0.079013	1.81787
F7+	0.00349	0.079952	2.08197
Ne8+	0.003176	0.080742	2.34254
Be	0.011325	0.04536	0.376301
B+	0.006103	0.043306	0.518393
C2+	0.005282	0.046018	0.690941
N3+	0.006157	0.051519	0.851247
O4+	0.006999	0.059641	1.00274
F5+	0.007628	0.068812	1.17419
Ne6+	0.008121	0.078275	1.35988
Ne	0.00372	0.035868	0.752199
Average	0.0057975	0.0639656	1.19778
SOGGA11X	Density	Gradient	Laplacian
B3+	0.00632	0.048574	0.573154
C4+	0.005854	0.055645	0.693575
N5+	0.005453	0.067051	1.03354
O6+	0.005152	0.076036	1.35504
F7+	0.004899	0.082786	1.60122
Ne8+	0.004642	0.087773	1.81206
Be	0.008393	0.026872	0.236133
B+	0.009254	0.035978	0.243327
C2+	0.009386	0.048853	0.392469
N3+	0.009609	0.061698	0.615607
O4+	0.009682	0.072726	0.848057
F5+	0.009705	0.082732	1.06949
Ne6+	0.009728	0.092355	1.28568
Ne	0.002522	0.024357	0.270269
Average	0.00718564	0.061674	0.859259
B3LYP	Density	Gradient	Laplacian
B3+	0.006026	0.054221	0.517893
C4+	0.004938	0.054056	0.629458
N5+	0.004187	0.053959	0.740335
O6+	0.003632	0.053895	0.851519
F7+	0.003206	0.053836	0.962748
Ne8+	0.00287	0.053814	1.07455
Be	0.012793	0.038258	0.227048
B+	0.009433	0.036087	0.286245
C2+	0.009178	0.041635	0.344308
N3+	0.009183	0.049366	0.42332
O4+	0.009345	0.057919	0.520267
F5+	0.009574	0.06771	0.640354
Ne6+	0.009795	0.07861	0.801524
Ne	0.006897	0.033781	0.338577
Average	0.00721836	0.0519391	0.59701
PBE0	Density	Gradient	Laplacian
B3+	0.005342	0.046673	0.416059
C4+	0.004501	0.048223	0.527361
N5+	0.003893	0.049339	0.63971
O6+	0.003429	0.050158	0.752837
F7+	0.003065	0.050827	0.866086
Ne8+	0.002771	0.051375	0.979943
Be	0.01023	0.02924	0.176315
B+	0.009977	0.033938	0.242897
C2+	0.009947	0.042784	0.316611
N3+	0.009969	0.051762	0.410073
O4+	0.01007	0.061577	0.522858
F5+	0.010212	0.072431	0.6597
Ne6+	0.010353	0.084028	0.838972
Ne	0.002836	0.016188	0.246947
Average	0.00689964	0.0491816	0.542598
TPSSh	Density	Gradient	Laplacian
B3+	0.002428	0.019345	0.223075
C4+	0.002079	0.020656	0.282844
N5+	0.001813	0.021588	0.335315
O6+	0.001603	0.022229	0.382416
F7+	0.001434	0.022696	0.428433
Ne8+	0.001297	0.023051	0.473765
Be	0.011939	0.025233	0.098977
B+	0.011129	0.036485	0.161698
C2+	0.011066	0.048521	0.252235
N3+	0.01106	0.060309	0.368706
O4+	0.011068	0.072175	0.511898
F5+	0.011096	0.084326	0.683728
Ne6+	0.01114	0.096747	0.884503
Ne	0.003893	0.018449	0.174209
Average	0.00664607	0.0408436	0.375843
PBE0-DH	Density	Gradient	Laplacian
B3+	0.003224	0.02772	0.241238
C4+	0.002775	0.029324	0.314623
N5+	0.002431	0.030458	0.38902
O6+	0.002161	0.031293	0.4641
F7+	0.001945	0.031979	0.539256
Ne8+	0.001767	0.032527	0.614905
Be	0.010597	0.02153	0.10235
B+	0.010018	0.029366	0.152692
C2+	0.009875	0.038609	0.217285
N3+	0.009835	0.0482	0.307859
O4+	0.009874	0.058477	0.434439
F5+	0.009956	0.069462	0.585914
Ne6+	0.010046	0.080908	0.762454
Ne	0.001777	0.012047	0.16665
Average	0.00616293	0.0387071	0.378056
B2PLYP	Density	Gradient	Laplacian
B3+	0.003465	0.032468	0.318427
C4+	0.002827	0.032296	0.387819
N5+	0.002382	0.032133	0.456758
O6+	0.002056	0.032014	0.525354
F7+	0.001807	0.03191	0.594293
Ne8+	0.001611	0.031836	0.663263
Be	0.010302	0.025892	0.144191
B+	0.008831	0.028747	0.186086
C2+	0.008513	0.03595	0.235047
N3+	0.008444	0.043786	0.310215
O4+	0.008525	0.052428	0.416435
F5+	0.008669	0.061999	0.555454
Ne6+	0.008818	0.072283	0.717719
Ne	0.004204	0.019398	0.198931
Average	0.00574671	0.0380814	0.407857
B2GPPLYP	Density	Gradient	Laplacian
B3+	0.002555	0.023766	0.231627
C4+	0.002091	0.023711	0.283376
N5+	0.001765	0.023626	0.334683
O6+	0.001525	0.023564	0.385556
F7+	0.001341	0.023505	0.436853
Ne8+	0.001196	0.023471	0.488049
Be	0.01032	0.021528	0.108395
B+	0.009063	0.027361	0.143751
C2+	0.00873	0.035152	0.19517
N3+	0.008653	0.043625	0.282091
O4+	0.008713	0.052854	0.397623
F5+	0.008827	0.062796	0.536614
Ne6+	0.008946	0.07325	0.699304
Ne	0.002647	0.01269	0.14132
Average	0.00545514	0.0336356	0.333172
PBE-QIDH	Density	Gradient	Laplacian
B3+	0.001762	0.014856	0.125094
C4+	0.001556	0.016194	0.169771
N5+	0.001385	0.017142	0.215196
O6+	0.001245	0.017847	0.260941
F7+	0.00113	0.018412	0.306971
Ne8+	0.001034	0.018869	0.353127
Be	0.010547	0.018091	0.055179
B+	0.009742	0.026597	0.100438
C2+	0.009552	0.03638	0.174209
N3+	0.009497	0.046431	0.272885
O4+	0.009512	0.056808	0.394812
F5+	0.009561	0.06751	0.540173
Ne6+	0.009622	0.078462	0.709648
Ne	0.00189	0.009726	0.105397
Average	0.00557393	0.0316661	0.270274
PBE0-2	Density	Gradient	Laplacian
B3+	0.001088	0.009056	0.074395
C4+	0.000982	0.010124	0.104449
N5+	0.000886	0.010879	0.135012
O6+	0.000803	0.011441	0.165751
F7+	0.000734	0.011886	0.196744
Ne8+	0.000674	0.012246	0.227753
Be	0.010428	0.017376	0.04093
B+	0.009477	0.026028	0.090579
C2+	0.009259	0.035751	0.162795
N3+	0.009201	0.045675	0.259094
O4+	0.00921	0.055821	0.378014
F5+	0.009249	0.06619	0.520001
Ne6+	0.009299	0.076742	0.685341
Ne	0.001355	0.006768	0.070124
Average	0.00518893	0.0282845	0.222213
HF	Density	Gradient	Laplacian
B3+	0.000432	0.004843	0.053814
C4+	0.000288	0.003882	0.052414
N5+	0.000206	0.003243	0.051399
O6+	0.000155	0.002779	0.050585
F7+	0.00012	0.002428	0.049845
Ne8+	9.6e-05	0.002154	0.049191
Be	0.025047	0.036616	0.064126
B+	0.017915	0.04464	0.117701
C2+	0.01513	0.054235	0.205928
N3+	0.01382	0.064871	0.324476
O4+	0.013146	0.07638	0.472881
F5+	0.012761	0.088328	0.6505
Ne6+	0.012532	0.100647	0.857232
Ne	0.009433	0.035269	0.160636
Average	0.00864864	0.0371654	0.225766
MP2	Density	Gradient	Laplacian
B3+	0.0001	0.000824	0.005941
C4+	5.6e-05	0.000571	0.004946
N5+	3.5e-05	0.000421	0.004279
O6+	2.3e-05	0.000324	0.003782
F7+	1.6e-05	0.000258	0.003399
Ne8+	1.2e-05	0.00021	0.003082
Be	0.010477	0.018731	0.03872
B+	0.008821	0.026147	0.087002
C2+	0.008411	0.034499	0.156285
N3+	0.008332	0.043504	0.246986
O4+	0.008347	0.052878	0.359618
F5+	0.008382	0.062382	0.493702
Ne6+	0.008425	0.071977	0.649194
Ne	0.00169	0.005854	0.024614
Average	0.00450907	0.0227557	0.148682
CCSD	Density	Gradient	Laplacian
B3+	0	0	0
C4+	0	0	0
N5+	0	0	0
O6+	0	0	0
F7+	0	0	0
Ne8+	0	0	0
Be	0.000647	0.001475	0.003689
B+	0.000451	0.001572	0.005857
C2+	0.000357	0.001659	0.008107
N3+	0.000299	0.001733	0.010414
O4+	0.000259	0.001792	0.01278
F5+	0.000229	0.001843	0.015209
Ne6+	0.000206	0.001886	0.017662
Ne	0.000983	0.002554	0.007741
Average	0.000245071	0.00103671	0.0058185
CCSDT	Density	Gradient	Laplacian
B3+	0	0	0
C4+	0	0	0
N5+	0	0	0
O6+	0	0	0
F7+	0	0	0
Ne8+	0	0	0
Be	8e-06	2e-05	5.7e-05
B+	6e-06	2.2e-05	8.2e-05
C2+	5e-06	2.4e-05	0.000113
N3+	5e-06	2.6e-05	0.000149
O4+	4e-06	2.7e-05	0.000188
F5+	4e-06	2.8e-05	0.000229
Ne6+	3e-06	3e-05	0.000271
Ne	2.7e-05	9.7e-05	0.000428
Average	4.42857e-06	1.95714e-05	0.000108357

## Sheet: S2
SVWN5	Density	Gradient	Laplacian
H2	0.028925	0.058371	0.096314
LiH	0.033361	0.094387	0.263697
Li2	0.031087	0.092162	0.310524
LiF	0.016775	0.081527	0.566101
BH3	0.027183	0.08192	0.334603
H2O	0.012621	0.06488	0.499786
HF	0.012049	0.068968	0.597819
CO	0.011883	0.071876	0.557906
N2	0.010492	0.070292	0.553338
F2	0.010987	0.071839	0.660446
Average	0.0195363	0.0756222	0.444053
SOGGA11	Density	Gradient	Laplacian
H2	0.040059	0.119046	0.45056
LiH	0.045658	0.123551	0.510339
Li2	0.071866	0.13031	0.547225
LiF	0.032208	0.096944	0.746416
BH3	0.031579	0.092	0.57108
H2O	0.021395	0.091673	0.729904
HF	0.019931	0.088112	0.790733
CO	0.020167	0.092042	0.809071
N2	0.021231	0.096163	0.815717
F2	0.016911	0.084042	0.840919
Average	0.0321005	0.101388	0.681196
BLYP	Density	Gradient	Laplacian
H2	0.022288	0.056298	0.150726
LiH	0.025298	0.064474	0.258159
Li2	0.031492	0.064776	0.293279
LiF	0.015209	0.053726	0.396461
BH3	0.015402	0.050946	0.286398
H2O	0.013583	0.047669	0.355757
HF	0.012662	0.048732	0.405437
CO	0.010204	0.044287	0.390313
N2	0.009826	0.043837	0.387072
F2	0.009556	0.044818	0.433385
Average	0.016552	0.0519563	0.335699
PBE	Density	Gradient	Laplacian
H2	0.01598	0.033307	0.085254
LiH	0.020853	0.048316	0.186911
Li2	0.024179	0.051276	0.226678
LiF	0.011968	0.039671	0.319544
BH3	0.013463	0.037463	0.222728
H2O	0.008723	0.031546	0.288108
HF	0.008809	0.033655	0.328066
CO	0.007131	0.031027	0.32161
N2	0.005671	0.029202	0.319292
F2	0.006283	0.03051	0.357107
Average	0.012306	0.0365973	0.26553
BP86	Density	Gradient	Laplacian
H2	0.013853	0.031604	0.086952
LiH	0.015962	0.043558	0.191405
Li2	0.018666	0.044104	0.224055
LiF	0.010822	0.039799	0.333449
BH3	0.011606	0.035542	0.224952
H2O	0.0084	0.032776	0.296045
HF	0.008358	0.035086	0.343812
CO	0.006457	0.030812	0.326617
N2	0.005121	0.028692	0.320793
F2	0.005912	0.031973	0.372016
Average	0.0105157	0.0353946	0.27201
RGE2	Density	Gradient	Laplacian
H2	0.014948	0.024903	0.045979
LiH	0.02226	0.046543	0.130856
Li2	0.023593	0.047642	0.162715
LiF	0.011038	0.037457	0.261437
BH3	0.015012	0.037793	0.169068
H2O	0.006889	0.027482	0.237672
HF	0.00735	0.031311	0.280268
CO	0.006607	0.029549	0.263701
N2	0.004818	0.02802	0.262268
F2	0.005934	0.031139	0.312175
Average	0.0118449	0.0341839	0.212614
M06L	Density	Gradient	Laplacian
H2	0.015712	0.045708	0.162581
LiH	0.015449	0.043214	0.285228
Li2	0.021224	0.045919	0.33868
LiF	0.008718	0.04726	0.47933
BH3	0.013484	0.046698	0.382662
H2O	0.010835	0.047663	0.443883
HF	0.008457	0.04557	0.491056
CO	0.009661	0.04373	0.494681
N2	0.009237	0.043311	0.478894
F2	0.006335	0.03518	0.475427
Average	0.0119112	0.0444253	0.403242
PKZB	Density	Gradient	Laplacian
H2	0.017279	0.03932	0.10071
LiH	0.020391	0.043155	0.165622
Li2	0.029354	0.048818	0.209568
LiF	0.009187	0.025396	0.211301
BH3	0.01081	0.032527	0.187344
H2O	0.008242	0.026448	0.209242
HF	0.007157	0.022048	0.215445
CO	0.006198	0.025618	0.236293
N2	0.006085	0.02714	0.239878
F2	0.004522	0.01861	0.229319
Average	0.0119225	0.030908	0.200472
SCAN	Density	Gradient	Laplacian
H2	0.007502	0.018752	0.049311
LiH	0.006272	0.023747	0.120236
Li2	0.008908	0.026951	0.147757
LiF	0.004686	0.019237	0.184893
BH3	0.005659	0.019352	0.136885
H2O	0.004189	0.016846	0.173259
HF	0.003667	0.017059	0.189263
CO	0.004022	0.017422	0.199066
N2	0.002634	0.015457	0.196526
F2	0.003303	0.018681	0.220727
Average	0.0050842	0.0193504	0.161792
MS0	Density	Gradient	Laplacian
H2	0.003938	0.009046	0.024234
LiH	0.006852	0.018982	0.086575
Li2	0.007889	0.022428	0.114831
LiF	0.006216	0.023723	0.211027
BH3	0.00562	0.017065	0.121446
H2O	0.010624	0.031734	0.221065
HF	0.007341	0.026858	0.240963
CO	0.007069	0.025712	0.223023
N2	0.006078	0.022664	0.215223
F2	0.005137	0.022152	0.242338
Average	0.0066764	0.0220364	0.170072
TPSS	Density	Gradient	Laplacian
H2	0.008734	0.021102	0.059032
LiH	0.008229	0.017251	0.077725
Li2	0.012691	0.022753	0.106546
LiF	0.007367	0.022946	0.158047
BH3	0.007142	0.021962	0.110095
H2O	0.007175	0.022675	0.159567
HF	0.006272	0.023267	0.1794
CO	0.004289	0.015651	0.144797
N2	0.003268	0.013361	0.137729
F2	0.003662	0.018585	0.184178
Average	0.0068829	0.0199553	0.131712
M062X	Density	Gradient	Laplacian
H2	0.010706	0.028022	0.09622
LiH	0.012478	0.047062	0.291393
Li2	0.019792	0.048885	0.33887
LiF	0.006012	0.040844	0.611671
BH3	0.008563	0.039144	0.344255
H2O	0.005264	0.035611	0.539251
HF	0.004333	0.034355	0.633531
CO	0.005783	0.036606	0.568554
N2	0.006	0.034547	0.54842
F2	0.006256	0.039109	0.686198
Average	0.0085187	0.0384185	0.465836
SOGGA11X	Density	Gradient	Laplacian
H2	0.008169	0.027544	0.12569
LiH	0.00855	0.028209	0.170969
Li2	0.008821	0.024867	0.191889
LiF	0.005255	0.03191	0.256666
BH3	0.005171	0.021666	0.150463
H2O	0.006251	0.03494	0.228363
HF	0.004498	0.03045	0.255728
CO	0.008229	0.035142	0.224403
N2	0.008173	0.036052	0.224243
F2	0.005892	0.032091	0.285201
Average	0.0069009	0.0302871	0.211362
B3LYP	Density	Gradient	Laplacian
H2	0.015655	0.039	0.103774
LiH	0.015045	0.042164	0.178017
Li2	0.022639	0.046879	0.206691
LiF	0.008125	0.033308	0.281116
BH3	0.010387	0.036779	0.206704
H2O	0.007382	0.030018	0.255201
HF	0.006908	0.030591	0.291473
CO	0.006028	0.029611	0.282014
N2	0.005744	0.029497	0.278925
F2	0.005702	0.031429	0.323889
Average	0.0103615	0.0349276	0.24078
PBE0	Density	Gradient	Laplacian
H2	0.008334	0.015537	0.035922
LiH	0.009398	0.026545	0.111333
Li2	0.014224	0.031532	0.141184
LiF	0.004112	0.019891	0.216048
BH3	0.007551	0.022087	0.14097
H2O	0.003497	0.018755	0.201379
HF	0.002854	0.016982	0.224142
CO	0.003156	0.019672	0.226814
N2	0.002945	0.019349	0.227278
F2	0.003762	0.020395	0.255598
Average	0.0059833	0.0210745	0.178067
TPSSh	Density	Gradient	Laplacian
H2	0.007437	0.017195	0.049292
LiH	0.007443	0.016292	0.069003
Li2	0.010779	0.01977	0.091845
LiF	0.00473	0.015387	0.128802
BH3	0.006153	0.018875	0.093316
H2O	0.005113	0.016801	0.135076
HF	0.004158	0.016136	0.148669
CO	0.002935	0.011427	0.122759
N2	0.001911	0.010082	0.118417
F2	0.002854	0.014647	0.165325
Average	0.0053513	0.0156612	0.11225
PBE0-DH	Density	Gradient	Laplacian
H2	0.005389	0.010458	0.025563
LiH	0.006533	0.019111	0.066875
Li2	0.007916	0.016697	0.071508
LiF	0.003857	0.016249	0.144473
BH3	0.004216	0.012988	0.082723
H2O	0.004294	0.016808	0.139248
HF	0.003199	0.015133	0.155301
CO	0.004433	0.017066	0.151595
N2	0.004015	0.016275	0.151772
F2	0.004424	0.018355	0.185618
Average	0.0048276	0.015914	0.117468
B2PLYP	Density	Gradient	Laplacian
H2	0.00983	0.024038	0.063067
LiH	0.0072	0.02265	0.104667
Li2	0.015316	0.029261	0.12663
LiF	0.005737	0.021182	0.171277
BH3	0.006101	0.022281	0.125132
H2O	0.004684	0.018137	0.154421
HF	0.004435	0.018321	0.174854
CO	0.004098	0.018654	0.173381
N2	0.003904	0.018514	0.172244
F2	0.003856	0.019528	0.196448
Average	0.0065161	0.0212566	0.146212
B2GPPLYP	Density	Gradient	Laplacian
H2	0.00769	0.018009	0.046411
LiH	0.004342	0.014912	0.072973
Li2	0.01175	0.021617	0.091255
LiF	0.003595	0.014001	0.122195
BH3	0.004463	0.016525	0.09142
H2O	0.003052	0.012395	0.111622
HF	0.002859	0.012355	0.125801
CO	0.003088	0.01356	0.126575
N2	0.002728	0.013253	0.125006
F2	0.00296	0.014984	0.147873
Average	0.0046527	0.0151611	0.106113
PBE-QIDH	Density	Gradient	Laplacian
H2	0.005801	0.013088	0.032545
LiH	0.007546	0.016155	0.041066
Li2	0.004434	0.007999	0.029378
LiF	0.003111	0.011374	0.086758
BH3	0.003186	0.009268	0.050533
H2O	0.003979	0.012784	0.088458
HF	0.003021	0.011747	0.098059
CO	0.003783	0.012061	0.091551
N2	0.003411	0.011586	0.091197
F2	0.003784	0.014097	0.124685
Average	0.0042056	0.0120159	0.073423
PBE0-2	Density	Gradient	Laplacian
H2	0.005852	0.013255	0.033572
LiH	0.007481	0.01395	0.030038
Li2	0.003487	0.004929	0.015038
LiF	0.001822	0.006845	0.054491
BH3	0.002838	0.007145	0.035104
H2O	0.002935	0.009218	0.059837
HF	0.002101	0.008079	0.065043
CO	0.002461	0.007725	0.058599
N2	0.002202	0.007548	0.05762
F2	0.002657	0.009914	0.086379
Average	0.0033836	0.0088608	0.0495721
HF	Density	Gradient	Laplacian
H2	0.013812	0.031483	0.079696
LiH	0.012195	0.023128	0.062226
Li2	0.014251	0.017371	0.047168
LiF	0.014949	0.041408	0.146892
BH3	0.012294	0.020248	0.06298
H2O	0.014083	0.039961	0.149576
HF	0.012879	0.040542	0.162199
CO	0.020465	0.04734	0.171766
N2	0.016842	0.041095	0.182245
F2	0.014448	0.045246	0.270969
Average	0.0146218	0.0347822	0.133572
MP2	Density	Gradient	Laplacian
H2	0.005148	0.01026	0.028267
LiH	0.006172	0.008888	0.017203
Li2	0.004573	0.007318	0.016472
LiF	0.003358	0.009052	0.029708
BH3	0.002286	0.004076	0.013981
H2O	0.004099	0.010633	0.038058
HF	0.00314	0.009095	0.037321
CO	0.004181	0.009456	0.03352
N2	0.003319	0.007565	0.034543
F2	0.002611	0.007492	0.027521
Average	0.0038887	0.0083835	0.0276594
CCSD	Density	Gradient	Laplacian
H2	0	0	0
LiH	0.000376	0.000504	0.00078
Li2	0.00109	0.001202	0.002193
LiF	0.00244	0.004728	0.011788
BH3	0.001519	0.002752	0.006232
H2O	0.00189	0.004159	0.013976
HF	0.001588	0.003718	0.012641
CO	0.003178	0.006639	0.024651
N2	0.002231	0.00521	0.024054
F2	0.002178	0.006566	0.042127
Average	0.001649	0.0035478	0.0138442
CCSDT	Density	Gradient	Laplacian
H2	0	0	0
LiH	3e-06	5e-06	1.6e-05
Li2	1.6e-05	2.2e-05	5e-05
LiF	0.000125	0.000293	0.000994
BH3	5.1e-05	9.9e-05	0.000206
H2O	0.000159	0.000379	0.001417
HF	9.4e-05	0.000266	0.001004
CO	0.000417	0.000864	0.003011
N2	0.000443	0.000909	0.003951
F2	0.000294	0.000889	0.005834
Average	0.0001602	0.0003726	0.0016483

## Sheet: S3
System	SVWN5	SOGGA11	BLYP	PBE	BP86	RGE2
B3+	-2.8677	-2.88366	-2.88885	-2.88701	-2.89158	-2.88235
C4+	-3.47958	-3.49456	-3.50133	-3.49937	-3.50417	-3.49469
N5+	-4.09143	-4.10545	-4.11364	-4.11157	-4.11652	-4.10687
O6+	-4.70327	-4.71662	-4.72583	-4.72367	-4.72867	-4.71896
F7+	-5.31511	-5.32831	-5.33794	-5.33572	-5.34072	-5.33099
Ne8+	-5.92694	-5.9401	-5.95	-5.94775	-5.9527	-5.94299
Be	-2.6963	-2.72029	-2.72131	-2.71897	-2.72126	-2.71219
B+	-3.51806	-3.5385	-3.5439	-3.54202	-3.54502	-3.5353
C2+	-4.33537	-4.35553	-4.36182	-4.36021	-4.36385	-4.35339
N3+	-5.15084	-5.17166	-5.17784	-5.17631	-5.18043	-5.16938
O4+	-5.96529	-5.98684	-5.99273	-5.99128	-5.99574	-5.98428
F5+	-6.77913	-6.80134	-6.80697	-6.80556	-6.81024	-6.7985
Ne6+	-7.59258	-7.61544	-7.62075	-7.61934	-7.62418	-7.61226
Ne	-12.3409	-12.3863	-12.3753	-12.3744	-12.3802	-12.3618
System	M06L	PKZB	SCAN	MS0	TPSS
B3+	-2.89887	-2.88903	-2.89376	-2.89396	-2.89462
C4+	-3.51141	-3.50139	-3.50617	-3.50629	-3.50697
N5+	-4.12367	-4.1136	-4.11841	-4.11845	-4.11917
O6+	-4.73579	-4.7257	-4.73054	-4.73052	-4.73126
F7+	-5.34782	-5.33775	-5.3426	-5.34254	-5.3433
Ne8+	-5.95982	-5.94977	-5.95462	-5.95453	-5.95529
Be	-2.72832	-2.72099	-2.72208	-2.72571	-2.72693
B+	-3.54982	-3.54404	-3.54511	-3.54846	-3.55002
C2+	-4.36889	-4.36221	-4.36338	-4.36656	-4.36815
N3+	-5.18593	-5.17828	-5.17948	-5.18252	-5.1841
O4+	-6.00103	-5.99322	-5.99438	-5.99734	-5.99893
F5+	-6.81506	-6.80745	-6.80857	-6.81149	-6.8131
Ne6+	-7.62849	-7.62121	-7.62227	-7.62519	-7.62682
Ne	-12.4127	-12.3703	-12.4008	-12.4009	-12.3876
System	M062X	SOGGA11X	B3LYP	PBE0	TPSSh
B3+	-2.89036	-2.89006	-2.88916	-2.8897	-2.89492
C4+	-3.50249	-3.50181	-3.50153	-3.50203	-3.50724
N5+	-4.11452	-4.11343	-4.11371	-4.11418	-4.11942
O6+	-4.72649	-4.72492	-4.7258	-4.72625	-4.7315
F7+	-5.33842	-5.33629	-5.33785	-5.33827	-5.34353
Ne8+	-5.95033	-5.94761	-5.94985	-5.95026	-5.95552
Be	-2.72374	-2.726	-2.72148	-2.72129	-2.72698
B+	-3.54633	-3.54883	-3.54367	-3.5441	-3.54999
C2+	-4.36418	-4.367	-4.36139	-4.36217	-4.3681
N3+	-5.18002	-5.18252	-5.1772	-5.17819	-5.18405
O4+	-5.99477	-5.9967	-5.99198	-5.9931	-5.99887
F5+	-6.80883	-6.81011	-6.80611	-6.80731	-6.81304
Ne6+	-7.62244	-7.62306	-7.61981	-7.62107	-7.62675
Ne	-12.3899	-12.3952	-12.3864	-12.3909	-12.3929
System	PBE0-DH	B2PLYP	B2GPPLYP	PBE-QIDH	PBE0-2
B3+	-2.89219	-2.8929	-2.89382	-2.89398	-2.89485
C4+	-3.50448	-3.5053	-3.5062	-3.50627	-3.50715
N5+	-4.11662	-4.11755	-4.11843	-4.11843	-4.11931
O6+	-4.72869	-4.72969	-4.73057	-4.7305	-4.73139
F7+	-5.34071	-5.34177	-5.34264	-5.34252	-5.34342
Ne8+	-5.95269	-5.95381	-5.95467	-5.9545	-5.95541
Be	-2.72368	-2.72513	-2.72583	-2.72539	-2.7262
B+	-3.54637	-3.54753	-3.54824	-3.5481	-3.54896
C2+	-4.36442	-4.36545	-4.36618	-4.36619	-4.36711
N3+	-5.18043	-5.18143	-5.18218	-5.18224	-5.1832
O4+	-5.99534	-5.99635	-5.9971	-5.99717	-5.99816
F5+	-6.80956	-6.8106	-6.81136	-6.81142	-6.81243
Ne6+	-7.62332	-7.62441	-7.62517	-7.6252	-7.62624
Ne	-12.3998	-12.3924	-12.396	-12.4023	-12.4016
System	HF	MP2	CCSD	CCSDT	CCSDTQ
B3+	-2.8966	-2.89647	-2.8963	-2.8963	-2.8963
C4+	-3.50897	-3.50881	-3.5087	-3.5087	-3.5087
N5+	-4.12117	-4.12101	-4.12093	-4.12093	-4.12093
O6+	-4.73327	-4.73312	-4.73306	-4.73306	-4.73306
F7+	-5.34532	-5.34517	-5.34512	-5.34512	-5.34512
Ne8+	-5.95732	-5.95718	-5.95714	-5.95714	-5.95714
Be	-2.72138	-2.72759	-2.73086	-2.73095	-2.73095
B+	-3.54562	-3.55064	-3.55395	-3.55401	-3.55401
C2+	-4.36446	-4.36896	-4.37243	-4.37249	-4.37249
N3+	-5.18096	-5.18519	-5.18888	-5.18893	-5.18893
O4+	-5.99617	-6.00025	-6.00419	-6.00424	-6.00424
F5+	-6.81059	-6.81461	-6.81882	-6.81887	-6.81887
Ne6+	-7.62449	-7.62849	-7.63299	-7.63304	-7.63304
Ne	-12.4179	-12.3956	-12.4027	-12.3995	-12.3994

## Sheet: S4
System	SVWN5	SOGGA11	BLYP	PBE	BP86	RGE2
H2	-0.681915	-0.695557	-0.690953	-0.69078	-0.6914	-0.68868
LiH	-2.16275	-2.19011	-2.19168	-2.18839	-2.19221	-2.18112
Li2	-3.59378	-3.63246	-3.63607	-3.63135	-3.63631	-3.6208
LiF	-12.2397	-12.2636	-12.2941	-12.2904	-12.2978	-12.2734
BH3	-5.03037	-5.05425	-5.07257	-5.06743	-5.07086	-5.05687
H2O	-9.21028	-9.25474	-9.24395	-9.24169	-9.24538	-9.22985
HF	-10.6874	-10.7321	-10.7209	-10.719	-10.7236	-10.7066
CO	-13.707	-13.7659	-13.768	-13.7623	-13.7685	-13.7429
N2	-13.5235	-13.5745	-13.5824	-13.5781	-13.5836	-13.5592
F2	-20.4971	-20.5834	-20.5729	-20.564	-20.5731	-20.5377
System	M06L	PKZB	SCAN	MS0	TPSS
H2	-0.694556	-0.69212	-0.693216	-0.695192	-0.695804
LiH	-2.20746	-2.19195	-2.1996	-2.20288	-2.20261
Li2	-3.6486	-3.63413	-3.6421	-3.64841	-3.64815
LiF	-12.3378	-12.2903	-12.3232	-12.324	-12.3122
BH3	-5.08545	-5.07171	-5.07686	-5.08544	-5.08448
H2O	-9.26783	-9.23887	-9.2568	-9.26177	-9.25342
HF	-10.7509	-10.7149	-10.74	-10.7422	-10.7316
CO	-13.7924	-13.7599	-13.7772	-13.7848	-13.7803
N2	-13.6048	-13.5752	-13.5875	-13.595	-13.5939
F2	-20.6134	-20.5565	-20.5972	-20.6049	-20.5876
System	M062X	SOGGA11X	B3LYP	PBE0	TPSSh
H2	-0.692994	-0.69251	-0.691332	-0.691832	-0.695591
LiH	-2.19601	-2.19912	-2.19477	-2.19459	-2.20348
Li2	-3.63932	-3.64413	-3.63811	-3.63761	-3.64875
LiF	-12.316	-12.322	-12.3089	-12.3135	-12.3192
BH3	-5.07144	-5.07875	-5.07341	-5.07196	-5.08439
H2O	-9.24764	-9.25337	-9.24879	-9.25041	-9.25568
HF	-10.7304	-10.7355	-10.7292	-10.7321	-10.7355
CO	-13.7605	-13.7726	-13.767	-13.7664	-13.7801
N2	-13.569	-13.5796	-13.5768	-13.5763	-13.5915
F2	-20.5706	-20.5813	-20.5788	-20.5776	-20.5907
System	PBE0-DH	B2PLYP	B2GPPLYP	PBE-QIDH	PBE0-2
H2	-0.692715	-0.692202	-0.692514	-0.693283	-0.693513
LiH	-2.19925	-2.19951	-2.20128	-2.20213	-2.20329
Li2	-3.64279	-3.64438	-3.64618	-3.64611	-3.64749
LiF	-12.3243	-12.314	-12.3189	-12.3268	-12.3254
BH3	-5.0754	-5.07689	-5.07793	-5.07748	-5.07828
H2O	-9.254	-9.2495	-9.2509	-9.25416	-9.25306
HF	-10.738	-10.7315	-10.7339	-10.7388	-10.7375
CO	-13.7697	-13.7708	-13.7714	-13.7714	-13.7717
N2	-13.5787	-13.5842	-13.5844	-13.5825	-13.5853
F2	-20.5833	-20.5801	-20.5816	-20.5837	-20.5821
System	HF	MP2	CCSD	CCSDT	CCSDTQ
H2	-0.690828	-0.693794	-0.694299	-0.694299	-0.694299
LiH	-2.20383	-2.20486	-2.20243	-2.2023	-2.20229
Li2	-3.64533	-3.64942	-3.64882	-3.64857	-3.64857
LiF	-12.353	-12.3167	-12.3307	-12.324	-12.3236
BH3	-5.07851	-5.07924	-5.08053	-5.07936	-5.0793
H2O	-9.25721	-9.24806	-9.25527	-9.25211	-9.25186
HF	-10.7496	-10.731	-10.7392	-10.7357	-10.7354
CO	-13.7634	-13.7706	-13.7753	-13.7747	-13.7743
N2	-13.5531	-13.5926	-13.5865	-13.5871	-13.5877
F2	-20.5932	-20.5749	-20.5902	-20.5869	-20.5865
